# Supplementary material for: The possibility of rainfall estimation using R(Z,Z&lt;sub&gt;DR&lt;/sub&gt;,K&lt;sub&gt;DP&lt;/sub&gt;,A&lt;sub&gt;H&lt;/sub&gt;): A case study of heavy rainfall on 25 August 2014 in Korea
Source: Copernicus journal article supplement (doi:10.5194/hess-2015-515), 2016-01-18
Supplement: Supplementary file [file supplement1_AH_calculation.pdf › supplement1_AH_calculation.pdf]

Supplement # 1 for the reviewer's comment No. 4

The  $A_H$  can be calculated from the radial profile of the attenuated reflectivity  $Z_a$  and the two-way PIA (Path Integrated Attenuation) along the propagation path ( $r_1, r_2$ ) proposed by Meneghini and Nakamura (1990),

$$A(r) = \frac{a(r)[Z_a]^b C(b, PIA)}{I_a(r_1, r_2) + C(b, PIA)I_a(r, r_2)}, \quad (1)$$

where,

$$I_a(r_1, r_2) = 0.46b \int_{r_1}^{r_2} a(s)[Z_a(s)]^b ds, \quad (2)$$

$$I_a(r, r_2) = 0.46b \int_r^{r_2} a(s)[Z_a(s)]^b ds, \quad (3)$$

If  $a$  is not dependent on range, then Eq. (1) becomes to

$$A(r) = \frac{[Z_a]^b C(b, PIA)}{I_a(r_1, r_2) + C(b, PIA)I_a(r, r_2)}, \quad (4)$$

where,

$$I_a(r_1, r_2) = 0.46b \int_{r_1}^{r_2} [Z_a(s)]^b ds, \quad (5)$$

$$I_a(r, r_2) = 0.46b \int_r^{r_2} [Z_a(s)]^b ds, \quad (6)$$

$$C(b, PIA) = \exp(0.23bPIA) - 1 \quad (7)$$

Bringi et al. (1990) recommended estimating PIA using  $\Phi_{DP}$  by

$$PIA(r_1, r_2) = \alpha [\Phi_{DP}(r_2) - \Phi_{DP}(r_1)] = \alpha \Delta \Phi_{DP}, \quad (8)$$

and Testud et al. (2000) used Eqs. (4) and (7) to obtain radial profiles of  $A_H$  at C-band. In this study,  $A_H$  was calculated by the method proposed by Ryzhkov et al. (2014). The constant  $b$  was set by 0.6 and  $\alpha$  was by 0.027 calculated by the ratio  $A_H$  to  $K_{DP}$  obtained from DSDs.

References:

Meneghini, R., Nakamura, K.: Range profiling of the rain rate by an airborne weather radar, *Remote Sensing of the Environment*, 31, 193-209, 1990.

- Bringi, V. N., Chandrasekar, V., Balakrishnan, N., Zrnic, D. S.: An examination of propagation effects in rainfall on polarimetric variables at microwave frequencies, *Journal of Atmospheric Oceanic Technology*, 7, 829-840, 1990.
- Ryzhkov, A., Dieberich, M., Zhang, P., Simmer, C.: Potential utilization of specific attenuation for rainfall estimation, mitigation of partial beam blockage, and radar networking”, *Journal of Atmospheric and Oceanic Technology*, 31, 599-619, 2014.
- Testud, J., Bouar, E. Le, Obligis, E., Ali-Mehenni, M.: The rain profiling algorithm applied to polarimetric weather radar, *Journal of Atmospheric Oceanic Technology*, 17, 332-356, 2000.
