# Supplementary material for: The possibility of rainfall estimation using R(Z,Z&lt;sub&gt;DR&lt;/sub&gt;,K&lt;sub&gt;DP&lt;/sub&gt;,A&lt;sub&gt;H&lt;/sub&gt;): A case study of heavy rainfall on 25 August 2014 in Korea
Source: Copernicus journal article supplement (doi:10.5194/hess-2015-515), 2016-01-18
Supplement: Supplementary file [file The possibility of rainfall estimation_R(Z,ZDR,KDP,AH)_for_submission_mod1_submission.pdf › The possibility of rainfall estimation_R(Z,ZDR,KDP,AH)_for_submission_mod1_submission.pdf]

# The validation of polarimetric rainfall estimates using $R(Z, Z_{DR})$ and $R(Z, Z_{DR}, K_{DP}, A_H)$ in Korea

C.-H. You<sup>1</sup>, M.-Y. Kang<sup>2</sup> and D.-I. Lee<sup>1,2</sup>

[1]{Atmospheric Environmental Research Institute, Pukyong National University, Busan, South Korea}

[2]{Department of Environmental Atmospheric Sciences, Pukyong National University, Busan, South Korea}

Correspondence to: D.-I. Lee (leedi@pknu.ac.kr)

## Abstract

To improve the accuracy of polarimetric rainfall relations with different  $Z_{DR}$  bias calculations using 9 gate averaged  $Z_{DR}$  and a disdrometer, three rainfall cases were analysed and some methods were examined. The observed differential reflectivity ( $Z_{DR}$ ) quality check was theoretically investigated using the relation between the standard deviation of differential reflectivity and cross correlation, and the light rain method for  $Z_{DR}$  bias was also applied to the rainfall estimation. The best performance for these heavy rainfall case was obtained when the moving average of  $Z_{DR}$  over a window size of 9 gates was applied to the rainfall estimation using horizontal reflectivity ( $Z_H$ ) and  $Z_{DR}$  and to the calculation of  $Z_H$  bias. The differential reflectivity calculated by disdrometer data may be an alternative to the vertical pointing scan for calculating  $Z_{DR}$  bias. Comparing the statistical scores between  $R(Z, Z_{DR})$  and  $R(Z, Z_{DR}, K_{DP}, A_H)$  in this study,  $R(Z, Z_{DR})$  had better performance than that of  $R(Z, Z_{DR}, K_{DP}, A_H)$ . However,  $R(Z, Z_{DR}, K_{DP}, A_H)$  is expected to be less sensitive especially to  $Z_H$  and  $Z_{DR}$  errors in both observations and simulations. Therefore,  $R(Z, Z_{DR}, K_{DP}, A_H)$  could be used as a representative rainfall relation in case  $Z_{DR}$  bias was not calculated accurately in Korea.

## 1 Introduction

Weather radar is a very useful remote sensing instrument for estimating rainfall amount due to its high spatial and temporal resolution compared with other instruments. Calculations of radar

rainfall are based on the relationship between reflectivity ( $Z$ ) and rain rate ( $R$ ) known as the  $Z$ – $R$  relation (hereafter  $R(Z)$ ). Experimentally measured drop size distributions (DSDs) have been extensively used to obtain both radar reflectivity and rain rate (Compos and Zawadzki, 2000). It can be shown that there is no unique global  $R(Z)$  relation because DSDs can vary from storm to storm and even within the storm itself (You et al., 2010). There have been a few studies on the calculation of the  $R(Z)$  relationship using disdrometer data with rainfall types and rain gage adjusted rainfall amount for operational Doppler weather radars in Korea (Jang et al., 2004; You et al., 2004; Suk et al., 2005).

Radar rainfall estimation may be contaminated by uncertainties such as hardware calibration, partial beam filling, rain attenuation, bright band, and non-weather echoes (Wilson and Brandes, 1979; Austin, 1989). To mitigate these problems, particle identification algorithms have been developed using polarimetric parameters for improving data quality control and rainfall estimates by discriminating non-meteorological artefacts such as anomalous propagation, birds, insects, second trip echo, and melting layer detection (Ryzhkov and Zrnic, 1998; Vivekanandan et al., 1999; Giangrande et al., 2008). The improvement of radar rainfall accuracy is a major reason for using polarimetric radar (Ryzhkov and Zrnic, 1996; May et al., 1999; Bringi and Chandrasekar, 2001). Ryzhkov et al. (2005a) developed a rainfall algorithm using polarimetric radar for the prototype WSR-88D (Weather Surveillance Radar-88 Doppler) system using different drop shape assumptions: 1) equilibrium shapes defined by Beard and Chuang (1987), 2) oscillating raindrop shape from Bringi et al. (2003) and 3) shapes specified by Brandes et al. (2002). Cifelli et al. (2011) compared two rainfall algorithms, CSU-HIDRO (Colorado State University-Hydrometeor Identification of Rainfall) and JPOLE (Joint Polarization Experiment)-like, in the high plains environment. Ryzhkov et al. (2014) recently investigated the potential use of specific attenuation ( $A_H$ ) for rainfall estimation with X-band and S-band radar and found that the  $R(A_H)$  method yields robust estimates of rain rates even at S band where attenuation is very small.

As a result of these theoretical and other experimental studies, many countries are replacing or modifying their radars and using polarimetric radar operationally. There are three major agencies that operate radars to monitor and forecast severe weather and flash flooding operationally in Korea: the Ministry of National Defense (MND), the Ministry of Land, Infrastructure and Transportation (MoLIT), and the Korea Meteorological Administration (KMA), with the MoLIT the first to install polarimetric radars in Korea. For successful

operational implementation of these radars, considerable research on rainfall estimation, hydrometeor classification, and DSD retrieval is required. However, there have been few studies on these polarimetric related issues other than the derivation of relationships using long period disdrometer data and the assessment of each relation after applying a very simple quality control for differential phase shift (You et al., 2014). You et al. (2014) found that the accuracy of rainfall estimation using horizontal reflectivity ( $Z_H$ ) and differential reflectivity ( $Z_{DR}$ ) obtained by DSDs in the Busan area in Korea was better than that obtained with relations calculated by DSDs measured in Oklahoma in the US. A quality control algorithm and unfolding of differential phase shift ( $\Phi_{DP}$ ) for calculating specific differential phase ( $K_{DP}$ ) were applied to the rainfall estimation (You et al., 2014). Recently, You et al. (2015a) proposed a relation combining many polarimetric variables of the form  $R(Z, Z_{DR}, K_{DP}, A_H)$  as a candidate for an optimum rainfall relation for S-band polarimetric data in Korea; this would allow a single relation to be used for different hydrometeor regimes in the absence of a stable hydrometeor classification algorithm. However, there are still issues to be resolved in improving  $Z_{DR}$  data quality and the robustness of  $R(Z, Z_{DR}, K_{DP}, A_H)$  for the heavy rainfall case where error propagation from each polarimetric variable can occur.

This paper discusses how to improve the accuracy of rainfall estimation using moving averaged differential reflectivity and examines the robustness of the  $R(Z, Z_{DR}, K_{DP}, A_H)$  relation for a heavy rainfall case in Korea. Sect. 2 describes the rain gage, DSD and radar dataset, together with the calculation of polarimetric variables from DSDs, how to check ZDR data quality and the validation methods. Sect. 3 provides  $Z_H$  and  $Z_{DR}$  bias correction, an examination of  $Z_{DR}$  data quality, the statistical results of rainfall estimation from observed and moving-average  $Z_{DR}$  using  $Z_H$  and  $Z_{DR}$  biases determined by radar and disdrometer, and the simulation to show the robustness of  $R(Z, Z_{DR}, K_{DP}, A_H)$  relation. Finally, we provide some conclusions in Sect. 4.

## **2 Data and methodology**

### **2.1 Gage, disdrometer and radar dataset**

The rainfall data from rain gages operated by the KMA were used to evaluate the accuracy of radar rainfall. Rain gages located within the radar coverage area at distances from 5 to 95 km of the radar are included in the analysis. Fig. 1 shows the location of all instruments used in this study. The circle is the radar coverage, the solid rectangle is the centre of the Bislsan radar, the plus signs show the rain gages within the radar coverage and the open rectangle is the location

of a PARSIVEL (PARticle Size VELOCITY) and POSS (Precipitation Occurrence Sensor System; detailed specifications are provided by Sheppard, 1990) disdrometer installed ~82 km away from the radar. The cross (ID 945, Daebuyung site), triangle (ID 926, Jinbook site), and diamond (ID 255, North Changwon site) with plus sign show the location of gages which recorded the maximum daily rainfall accumulation in each rainfall events will be analysed in Sect. 2.4.

Relations for converting radar variables into rain rate are required because the radar does not observe rainfall directly. To calculate these relations, disdrometer data that can measure the DSDs are needed. One-min DSDs obtained by the POSS from 2001 to 2004 were used. To improve the accuracy of  $Z_{DR}$ , DSDs observed by PARSIVEL on 23 August 2012, 8 September 2012 and 25 August 2014 were used because POSS data were not available at that time. The PARSIVEL disdrometer is a laser-optic system that measures 32 channels from 0.062 to 24.5 mm (detailed specifications are given by Löffler-Mang and Joss, 2000).

Unreliable data, defined as belonging to the following categories, were removed: 1-min rain rate less than  $0.1 \text{ mm h}^{-1}$ ; total number concentrations of all channels less than 10; drop numbers counted only in the lower 10 channels (0.84 mm for POSS and 1.187 mm for PARSIVEL (You et al., 2015b)).

Radar data were collected by the Bislsan polarimetric radar installed and operated by the MoLIT in Korea since 2009. The transmitted peak power is 750 kW, beam width is  $0.95^\circ$ , and frequency is 2.791 GHz. The polarimetric variables are estimated with a gate size of 0.125 km. The scan strategy is composed of 6 elevation angles with 2.5-min update interval. Polarimetric variables for  $0.5^\circ$  elevation angle were extracted from the volume data every 10 mins for this study.

## 2.2 Calculation of polarimetric variables

Polarimetric variables were calculated using T-matrix scattering techniques derived by Waterman (1971) and later developed further by Mishchenko et al. (1996). The following raindrop shape assumptions are used for the calculation of variables from the DSDs:

$$\frac{b}{a} = 1.0048 + 0.00057 D - 0.02628 D^2 + 0.003682 D^3 - 0.0001677 D^4, \quad (1)$$

$$\frac{b}{a} = 1.012 - 0.01445 D - 0.01028 D^2, \quad (2)$$



where  $a$ ,  $b$  and  $D$  are the major axis, minor axis, and equi-volume diameter of raindrop in millimetres, respectively.

Eq. (1) is for the equilibrium axis ratio derived from the numerical model of Beard and Chung (1987), which is in good agreement with the results from wind tunnel measurements. The actual shapes of raindrops in turbulent flow are expected to be different from the equilibrium shapes due to drop oscillations. Oscillating drops appear to be more spherical on average than drops with equilibrium shapes as shown by Andsager et al. (1999) in laboratory studies. They demonstrated that the shape of raindrops with diameter between 1.1 and 4.4 mm is better explained by Eq. (2). You et al. (2015a) found that combining Eq. (1) for drops less than 1.1 mm and larger than 4.4 mm with Eq. (2) for the drop diameter between 1.1 and 4.4 mm as proposed by Bringi et al. (2003) gave the best rainfall estimation compared with other drop axis ratio assumptions in Korea, and we use this combined formulation in this study. Other parameters in the T-matrix calculations include the temperature, which is assumed to be 20°C in this study. The distribution of canting angles of raindrops is Gaussian with a mean of 0° and a standard deviation of 7°, as determined recently by Huang et al. (2008).

$A_H$  was calculated from the radial profile of the attenuated reflectivity and two-way PIA (Path Integrated Attenuation) along the propagation path using observed  $Z_H$ , differential phase shift from BSL radar. The more detailed description for  $A_H$  calculation can be found in You et al. (2015a).

### 2.3 $Z_{DR}$ data quality improvement

$Z_{DR}$  is an important variable for hydrometeor classification and rainfall estimation. To improve the  $Z_{DR}$  data quality, the accuracy of the observed  $Z_{DR}$  value was examined. We use the theoretical relation between the standard deviation of  $Z_{DR}$  and the cross correlation following the Eqs (3) and (4) as shown in Eqs. (6.142) and (5.195) of Bringi and Chandrasekar (2001):

$$SD(Z_{DR}) = 10 \log_{10} \left\{ 1 + \left[ \frac{2}{N} (1 - |\rho_{hv}|^2) \sum_{l=-(N-1)}^{N-1} \left( 1 - \frac{|l|}{N} \right) |\rho_{hv}(l)|^2 \right]^{1/2} \right\}, \quad (3)$$

where  $SD(Z_{DR})$  is standard deviation of  $Z_{DR}$ ,  $N$  is the number of samples and  $\rho_{hv}$  is the cross correlation, given by

$$\rho_{hv}[n] = \exp\left(-\frac{8\pi^2\sigma_v^2 n^2 T_s^2}{\lambda^2}\right), \quad (4)$$

where  $\rho_{hv}$  is the cross correlation,  $\sigma_v$  is Doppler width,  $n$  is sample number, and  $T_s$  is dwell time.

For a better comparison we display the correlations in  $L$  space, as proposed by Keat et al. (2015)

$$L = -\log_{10}(1 - \rho_{hv}), \quad (5)$$

where,  $\rho_{hv}$  is cross correlation.

We also examined the impact of  $Z_{DR}$  bias as obtained from radar and disdrometer data on the accuracy. The  $Z_{DR}$  bias correction is important for the absolute calibration of the radar using the self-consistency method. Gorgucci et al. (1999) proposed a vertical pointing scan of light rain to take advantage of the nearly spherical shape of the raindrops seen from below. Ryzhkov et al. (2005a) used the elevation angle dependency of  $Z_{DR}$  as an alternative technique and concluded that the high variability of  $Z_{DR}$  in rainfall means it is not possible to achieve the required absolute calibration of 0.2 dB. They also proposed a method using the structural characteristics of the melting layer in stratiform clouds and measured the dry aggregated snow present above the melting layer, which gave a mean value of 0.2 dB at S band and an accuracy of 0.1 to 0.2 dB. Trabal et al. (2009) evaluated two different methods using the intrinsic properties of dry aggregated snow present above the melting layer and measurements of light rain close to the ground and found that a  $Z_{DR}$  calibration accuracy of 0.2 dB or less was achieved for both events analysed when both methods are compared. The vertical pointing data were not available for the case considered here and the scan strategy of BSL with six elevation angles (-0.5, 0.0, 0.5, 0.18, 1.2, 1.6 degree) is not allowed to use dry aggregated snow method to calculate  $Z_{DR}$  bias. Therefore, light rain measurements close to the ground were used to calibrate the  $Z_{DR}$  and  $Z_H$  biases using the self-consistency method in this study. Very light rain was defined by the thresholds  $20 \text{ dBZ} \leq Z_H \leq 28 \text{ dBZ}$  as proposed by Marks et al. (2011). The  $Z_H$  bias was determined following Ryzhkov et al. (2005b).

To obtain  $Z_{DR}$  bias from disdrometer, the DSD data observed from Parsivel were quality controlled and polarimetric variables were calculated by T-matrix simulation with the same configuration as in Sect. 2.2. The measured  $Z_{DR}$  from Parsivel were compared with the  $Z_{DR}$  value at each point from radar obtained by averaging  $Z_{DR}$  over a small area ( $3 \text{ km} \times 3^\circ$ ) centered

on the Parsivel (Fig. 2). The difference of  $Z_{DR}$  between radar and Parsivel was chosen as a ZDR bias.

## 2.4 Validation

The three rainfall events occurred on 23 August 2012, 8 September 2012, and 25 August 2014, which were caused by indirect effect of Typhoon, low pressure accompanied with the front, and low pressure, respectively, were used to validate the rainfall relations. Fig. 3 shows the time series of hourly rainfall and accumulated rainfall from the three gages, ID 945, ID 255, and ID 926 that recorded the highest rainfall within the radar coverage area at each day. The daily accumulated rainfall values were around 210 mm, 150 mm, and 269 mm for these gages. The time period analysed for each event was from 0900 LT to 1700 LT (Case 1), from 0100 LT to 0600 LT (Case 2), and from 0900 LT to 1600 LT (Case 3), respectively (Table 1).

The normalized error (NE), fractional root mean square error (RMSE), and correlation coefficients (CC) of the rainfall relations and 121 gages were used to investigate the performance of each rainfall relation:

$$NE = \frac{\frac{1}{N} \sum_{i=1}^N |R_{R,i} - R_{G,i}|}{\overline{R_G}}, \quad (6)$$

$$RMSE = \left[ \frac{1}{N} \sum_{i=1}^N (R_{R,i} - R_{G,i})^2 \right]^{1/2}, \quad (7)$$

$$CC = \frac{\sum_{i=1}^N (R_{R,i} - \overline{R_R})(R_{G,i} - \overline{R_G})}{\left[ \sum_{i=1}^N (R_{R,i} - \overline{R_R})^2 \right]^{1/2} \left[ \sum_{i=1}^N (R_{G,i} - \overline{R_G})^2 \right]^{1/2}}, \quad (8)$$

where N is the number of radar rainfall ( $R_R$ ) and gage rainfall ( $R_G$ ) pairs, and  $\overline{R_R}$  and  $\overline{R_G}$  are the hourly rainfall amount for each rainfall event from the radar and gage, respectively. These statistical variables are calculated using hourly rainfall amounts derived from the radar and gage at the location of the gage. The radar rainfall at the rain gage was obtained by averaging rainfall over a small area ( $1 \text{ km} \times 1^\circ$ ) centered on each rain gage. The rainfall relations for calculating radar rainfall were obtained from the simulated polarimetric variables generated from DSDs. Fig. 4 shows the scatter plot of rain rate obtained from disdrometer and polarimetric radar

rainfall relations  $R(Z, Z_{DR})$  and  $R(Z, Z_{DR}, K_{DP}, A_H)$  which are same relations used in You et al. (2015a). The CC and RMSE of  $R(Z, Z_{DR})$  ( $R(Z, Z_{DR}, K_{DP}, A_H)$ ) were 0.95 (0.99) and 3.5 mm h<sup>-1</sup> (1.2 mm h<sup>-1</sup>). The rainfall relations for validation and simulation are summarized in Table 2.

With the relation using combined polarimetric variables,  $R(Z, Z_{DR}, K_{DP}, A_H)$ , error propagation can affect the accuracy of radar rainfall estimation because  $Z$  and  $K_{DP}$  are usually correlated. To examine the contribution of errors from each variable, simulated polarimetric variables such as  $Z$ ,  $Z_{DR}$ ,  $K_{DP}$ ,  $A_H$ , were generated with dimensions of 960 sizes of bins and 360 radials. Fig. 13 shows the distribution function of the polarimetric variables generated assuming a Gaussian distribution. Fig. 5 (a) shows the occurrence frequency of  $Z_H$  generated with standard deviation of 7.0 dBZ and mean of 30.0 dBZ. Fig. 5 (b) shows the corresponding occurrence frequency of  $Z_{DR}$  with 0.5 dB standard deviation and 1.0 dB mean. Fig. 5 (c) shows the occurrence frequency of  $K_{DP}$  generated with 0.5° km<sup>-1</sup> standard deviation and 1.0° km<sup>-1</sup> mean. Fig. 5 (d) shows the occurrence frequency of  $A_H$  generated with 0.01 dB km<sup>-1</sup> standard deviation and 0.0003 dB km<sup>-1</sup> mean.

### 3 Results

#### 3.1 Data quality of $Z_{DR}$

##### 3.1.1 Improvement of $Z_{DR}$ data quality using moving average

To check the quality of the  $Z_{DR}$  measurements, the radial profile of  $Z_{DR}$  was investigated as shown in Fig. 6. Fig. 6 (a) shows the spatial distribution of  $Z_{DR}$  at 0.5° elevation at 1401 LT on 25 August 2014. Fig. 6 (b) shows the radial profile of observed  $Z_{DR}$  (red line) and the standard deviation of  $Z_{DR}$  (black line) calculated using 9 gates along the line A–B shown in Fig. 6 (a). The average standard deviation of  $Z_{DR}$  along the line was 0.615 dB. Fig. 6 (c) shows the radial profile of the cross correlation; the average cross correlation was 0.982.

Fig. 7 shows the theoretical relation between the standard deviation of  $Z_{DR}$  and the cross correlation coefficient. Fig. 7 (a) shows the results obtained using the scan configuration of the Bislan radar. The dwell time is 56 ms, number of samples is 55, and the normalised Doppler width is 0.02. Fig. 7 (a) suggests that for an accuracy of 0.1 dB in  $Z_{DR}$  with 1 ms<sup>-1</sup> Doppler width, a value of  $L$  of over 3 ( $\rho_{hv} > 0.999$ ) is needed. Such values cannot be measured with the antenna. In Fig. 7 (b) the number of samples is 495, which corresponds to 9 gates, 1.125 km in

range; an accuracy of 0.2 dB in  $Z_{DR}$  (the moving-average  $Z_{DR}$ , hereafter  $mZ_{DR}$ ) is achieved with 1 ms<sup>-1</sup> Doppler width and a value of L of 1.7 ( $\rho_{hv} > 0.980$ ).

Fig. 8 shows the results for  $Z_{DR}$  measurements at 1401 LT on 25 August 2014. Fig. 8 (a) shows the spatial distribution of a moving average  $Z_{DR}$  from 9 gates. Fig. 8 (b) shows the radial profile of the  $Z_{DR}$  (red line) and its standard deviation (black line) calculated for 9 gates along the line A–B shown in Fig. 8 (a). The average standard deviation of  $Z_{DR}$  along the ray was 0.169 dB. Fig. 8 (c) shows the radial profile of the cross correlation; the average cross correlation was 0.985. Both the standard deviation of  $Z_{DR}$  and the averaged  $\rho_{hv}$  values are very close to the theoretical values (standard deviation of  $Z_{DR}$  is 0.160 and  $\rho_{hv}$  is 0.987) as shown in Fig. 7. Therefore, in the next Sect. a 9-gage moving average  $Z_{DR}$  (i.e.,  $mZ_{DR}$ ) was used for absolute  $Z_H$  bias correction and rainfall estimation, and its effect on the performance of radar rainfall estimation was examined for three events as mentioned in Sect. 2.4.

The  $Z_H$  biases for Case 1, Case 2, and Case 3 calculated with the self-consistency method using observed  $Z_{DR}$  and  $mZ_{DR}$  are -4.52 dB and -3.65 dB, -0.39 dB and -0.3 dB, -1.95 dB and -1.48 dB, respectively. The  $Z_{DR}$  biases for each case calculated by the very light rain method using observed  $Z_{DR}$  (0.49 dB, 0.33 dB, and 0.26 dB) and  $mZ_{DR}$  (0.39 dB, 0.33 dB, and 0.3 dB), respectively.

### 3.1.2 Improvement of $Z_{DR}$ data quality using disdrometer

Before applying the DSDs to rainfall estimation, 10-min rainfall amounts obtained by DSDs and gages were compared. Fig. 9 shows the scatter plot of 10-min rainfall amount measured by PARSIVEL and the gage located less than 100 m away from PARSIVEL for three rainfall events. The daily accumulated rainfall amounts of Case 1 were 52.5 mm for the gage and 51.5 mm for PARSIVEL. The RMSE, NE, and CC between two instruments for Case 1 were 0.28 mm, 0.24, and 0.98, respectively. The daily accumulated rainfall amounts of Case 2 (Case 3) were 55.0 mm (116.0 mm) for the gage and 54.3 mm (129.4 mm) for PARSIVEL. The RMSE, NE, and CC between two instruments for Case 2 (Case 3) were 1.25 mm (0.83 mm), 0.25 (0.21), and 0.97 (0.99), respectively. The calculated  $Z_{DR}$  biases for Case 1 were 0.16 dB for observed  $Z_{DR}$  and 0.158 dB for  $mZ_{DR}$ . The calculated  $Z_{DR}$  biases for Case 2 (Case 3) were 0.01 dB (-0.05 dB) for observed  $Z_{DR}$  and 0.007 dB (-0.07 dB) for  $mZ_{DR}$ . The  $Z_H$  biases described in Sect. 3.1.2 were used.

## 3.2 Validations of two rainfall relations

### 3.2.1 The performance of rainfall relations with $Z_H$ and $Z_{DR}$ biases obtained by radar

To investigate the performance of  $R(Z, Z_{DR})$  and  $R(Z, Z_{DR}, K_{DP}, A_H)$ , which is related to the  $Z_H$  and  $Z_{DR}$  bias, NE, RMSE, and CC were calculated using hourly rainfall from each relation and from the gages. For the comparison of rainfall amount, two different  $Z_H$  and  $Z_{DR}$  biases were applied to observed variables as mentioned in Sect. 3.1.1. Each bias was calculated using observed  $Z_{DR}$  and  $mZ_{DR}$ .

Fig. 10 shows the scatter plot of 1 hour rainfall obtained using  $R(Z, Z_{DR})$  and gage data for three cases, Fig. 10 (a) and Fig. 10 (b) for Case 1, Fig. 10 (c) and Fig. 10 (d) for Case 2, Fig. 10 (e) and Fig. 10 (f) for Case 3. In Fig. 10 (a) the  $Z_H$  bias was obtained from the observed  $Z_{DR}$  bias and the  $Z_{DR}$  biases calculated from observed  $Z_{DR}$  (blue full circles) and  $mZ_{DR}$  (red full circles). The RMSE, NE, and CC of the relation using  $mZ_{DR}$  were as much as  $4.9 \text{ mm h}^{-1}$ , 0.88, and 0.89, respectively and the statistical scores were better than those obtained using observed  $Z_{DR}$ . In Fig. 10 (b) the  $Z_H$  bias was calculated from  $mZ_{DR}$ . The RMSE, NE, and CC of the relation using  $mZ_{DR}$  were  $3.6 \text{ mm h}^{-1}$ , 0.63, and 0.89, the performance of the relation using  $mZ_{DR}$  was better than that obtained using observed  $Z_{DR}$ , respectively. The statistical scores using  $Z_H$  bias obtained from  $mZ_{DR}$  were higher than those of obtained from observed  $Z_{DR}$ . In Fig. 10 (c), (d), (e), and (f), the results were similar pattern to Fig. 10 (a) and Fig. 10 (b). It is considered that the accuracy of the rainfall estimate using  $mZ_{DR}$  is statistically more robust than that for the estimate based on observed  $Z_{DR}$ . The RMSE, NE, and CC for all cases to compare the performance of  $R(Z, Z_{DR})$  rainfall estimates obtained using different  $Z_H$  and  $Z_{DR}$  biases are summarized in Table 3.

Fig. 11 shows the scatter plots when  $R(Z, Z_{DR}, K_{DP}, A_H)$  is used for rainfall estimation at the same time period used in Fig. 10. Fig. 11 (a), Fig. 11 (c), and Fig. 11 (e) show the radar rainfall calculated using the  $Z_H$  bias obtained from the observed  $Z_{DR}$  bias and the  $Z_{DR}$  biases obtained from observed  $Z_{DR}$  (blue full circles) and  $mZ_{DR}$  (red full circles) for Case 1, Case 2, and Case 3, respectively. Fig. 11 (b), Fig. 11 (d), and Fig. 11 (f) show the radar rainfall obtained using  $Z_H$  bias calculated from  $mZ_{DR}$  and the  $Z_{DR}$  biases calculated from observed  $Z_{DR}$  (blue full circles) and  $mZ_{DR}$  (red full circles) for Case 1, Case 2, and Case 3, respectively. The RMSE, NE, and CC from each relation were not very different; differences of RMSE, NE, and CC in the two

cases were  $0.1 \text{ mm h}^{-1}$ ,  $0.01$ ,  $0$  for Case 1,  $0.1 \text{ mm h}^{-1}$ ,  $0.0$ ,  $0.0$  for Case 2, and  $0.2 \text{ mm h}^{-1}$ ,  $0.01$ , and  $0$  for Case 3, respectively. The statistics for the comparison of radar rainfall obtained using different  $Z_H$  and  $Z_{DR}$  biases are summarized in Table 4. These results show that  $R(Z, Z_{DR}, K_{DP}, A_H)$  is less sensitive to  $Z_{DR}$  error than  $R(Z, Z_{DR})$ .

### 3.2.2 The performance of the relations using $Z_{DR}$ bias obtained by disdrometer

Fig. 12 shows the scatter plots of 1-hour rainfall obtained by  $R(Z, Z_{DR})$  and gages for three cases. The radar rainfall was calculated after  $Z_{DR}$  bias correction using the bias result in the comparison between radar  $Z_{DR}$  and PARSIVEL  $Z_{DR}$ . The  $Z_{DR}$  biases for each case were  $0.16 \text{ dB}$ ,  $0.01 \text{ dB}$ ,  $-0.05 \text{ dB}$  for observed  $Z_{DR}$  and  $0.157 \text{ dB}$ ,  $0.007 \text{ dB}$ ,  $-0.07 \text{ dB}$  for  $mZ_{DR}$ . In Fig. 12 (a) the  $Z_H$  bias was obtained from the observed  $Z_{DR}$  bias and  $Z_{DR}$  biases calculated from observed  $Z_{DR}$  (blue full circle) and  $mZ_{DR}$  (red full circle) for Case 1. The radar rainfall using  $mZ_{DR}$  was better than that using observed  $Z_{DR}$  by as much as  $0.4 \text{ mm h}^{-1}$  for RMSE and  $0.06$  for NE. In Fig. 12 (b) the  $Z_H$  bias was calculated from  $mZ_{DR}$ ; the improved rainfall estimation using  $mZ_{DR}$  is also shown. The rainfall estimation using  $mZ_{DR}$  and  $Z_H$  bias obtained by  $mZ_{DR}$  was much better than that using observed  $Z_{DR}$  by as much as  $1.3 \text{ mm h}^{-1}$  for RMSE and  $0.23$  for NE. The similar patterns were obtained from Fig. 12 (e) and Fig. 12 (f). The RMSE, NE, and CC for three rainfall events to compare the performance of  $R(Z, Z_{DR})$  rainfall estimates obtained using  $Z_{DR}$  biases determined by a disdrometer are summarized in Table 5. This result shows the better scores compared with the statistics shown in Fig. 7 that were obtained using  $Z_{DR}$  biases extracted from the radar  $Z_{DR}$  only. When the observed  $Z_{DR}$ , which fluctuates considerably along the ray, was applied to the rainfall estimation, the rainfall amount was much more variable with  $Z_H$  bias values than that with  $mZ_{DR}$ . According to these results, when moving average  $Z_{DR}$  (i.e.,  $mZ_{DR}$ ) is used with the  $Z_{DR}$  bias measured by PARSIVEL, the accuracy of rainfall estimation was improved and was more stable than that of other configurations using  $R(Z, Z_{DR})$ . However, these results would be changed when the drop size distribution of the rainfall system was fluctuated with height especially at the layer between radar beam and ground. And the wind effect is another limitation of this results.

Fig. 13 shows the scatter plots for  $R(Z, Z_{DR}, K_{DP}, A_H)$  and gages for all events. The statistical scores were not very different from  $Z_H$  and  $Z_{DR}$  biases. The biggest differences of RMSE and NE for three cases between each relation were only  $0.1 \text{ mm h}^{-1}$  and  $0.01$ , respectively. These behaviors were similar to the results obtained in Sect. 3.2.1. The statistics for the comparison

of radar rainfall obtained using  $Z_{DR}$  biases determined by a disdrometer are summarized in Table 6.

### 3.2.3 The simulation of $R(Z, Z_{DR}, K_{DP}, A_H)$ using generated variables

To investigate the extent of contamination of the rainfall amount by propagation of errors in each polarimetric variable for  $R(Z, Z_{DR}, K_{DP}, A_H)$ , the errors of  $Z$ ,  $Z_{DR}$ , and  $K_{DP}$  ingested to simulated data were 0 to 5 dBZ with interval 0.25 dBZ, 0 to 0.6 dB with interval 0.03 dB, and 0 to 0.2 degree  $\text{km}^{-1}$  with interval 0.01 degree  $\text{km}^{-1}$ , respectively. The rain rate was calculated by same  $R(Z, Z_{DR}, K_{DP}, A_H)$  as applied to real data in the previous Sect.. The RMSE and NE were calculated for rainfall amount with and without error-ingested polarimetric variables. The rainfall amount obtained using the raw simulated variables was used as a reference.

Fig. 14 shows the RMSE and NE distribution of different polarimetric rainfall relations with ingested error. The magenta, black, red, green, blue, and purple lines show RMSE and NE obtained by the rainfall relations  $R(Z)$ ,  $R(K_{DP})$ ,  $R(Z, K_{DP}, A_H)$ ,  $R(Z, Z_{DR})$ ,  $R(K_{DP}, Z_{DR})$ , and  $R(Z, Z_{DR}, K_{DP}, A_H)$ , respectively. The threshold rainfall was from 0 to 300  $\text{mm h}^{-1}$  for calculating statistical scores. Fig. 14 (a) shows the RMSE distribution of each rainfall relation with different ingested error step. The RMSE of  $R(Z, K_{DP}, A_H)$  is the largest of all the rainfall relations. The RMSE of  $R(Z, Z_{DR}, K_{DP}, A_H)$  is higher than that of  $R(Z)$ ,  $R(Z, Z_{DR})$ , and  $R(K_{DP}, Z_{DR})$  but less than that of  $R(K_{DP})$ . It means that not all errors from  $Z$ ,  $Z_{DR}$ , and  $K_{DP}$  propagate into the  $R(Z, Z_{DR}, K_{DP}, A_H)$ . Fig. 14 (b) shows the corresponding distributions for NE. The value of NE increases in the order  $R(Z, Z_{DR}, K_{DP}, A_H)$ ,  $R(Z, K_{DP}, A_H)$ ,  $R(K_{DP})$ ,  $R(K_{DP}, Z_{DR})$ ,  $R(Z, Z_{DR})$ , and  $R(Z)$ . In Sect. 3.2.1 and 3.2.2, the statistical scores of  $R(Z, Z_{DR}, K_{DP}, A_H)$  did not change significantly with respect to different  $Z_H$  and  $Z_{DR}$  biases. The results of the simulation and observations suggest that the accuracy of  $R(Z, Z_{DR}, K_{DP}, A_H)$  is relatively weakly affected by errors in each polarimetric variable even though the error co-variances were not considered in the simulation.

## 4 Conclusions

To improve polarimetric rainfall estimation and examine the candidates for an optimum rainfall relation using polarimetric variables observed from the Bislsan radar, the first polarimetric radar in Korea, the three rainfall systems were analysed.

The theoretical approach to investigate the observed  $Z_{DR}$  quality used the relation between the standard deviation of  $Z_{DR}$  and  $\rho_{hv}$  using the scan strategy parameters of the Bislsan radar. The



1 result showed that more samples were required to achieve the theoretical accuracy in  $Z_{DR}$ . The  
2 best performance was obtained when a moving average  $Z_{DR}$  with window size of 9 gates was  
3 applied to the rainfall estimation using  $R(Z, Z_{DR})$  and to the calculation of  $Z_H$  bias. The  $Z_{DR}$   
4 quality check should be performed before using  $Z_{DR}$  for quantitative applications like rainfall  
5 estimation and hydrometeor classification for the Bislsan radar. We also expect that the light  
6 rain method for obtaining the  $Z_{DR}$  bias may be used as an alternative to the vertical pointing  
7 scan method, because the rainfall estimation using this method performed well in our case.

8 Using DSD data for the calculation of  $Z_{DR}$  bias might give more accurate rainfall estimation  
9 with  $R(Z, Z_{DR})$ , even it is limited to the homogeneous DSD at the layer between radar beam  
10 height and ground and not strong wind condition which could degrade the quality of  $Z_{DR}$   
11 calculation from disdrometer. Comparing the statistical scores between the most accurate  
12  $R(Z, Z_{DR})$  and  $R(Z, Z_{DR}, K_{DP}, A_H)$  in this study,  $R(Z, Z_{DR})$  had better performance than that of  
13  $R(Z, Z_{DR}, K_{DP}, A_H)$ .

14 However,  $R(Z, Z_{DR}, K_{DP}, A_H)$  is expected to be less sensitive especially to  $Z_H$  and  $Z_{DR}$  errors in  
15 both observations and simulations. Therefore,  $R(Z, Z_{DR}, K_{DP}, A_H)$  could be used as a  
16 representative rainfall relation in case  $Z_{DR}$  bias was not calculated accurately in Korea.

## 18 **Acknowledgements**

19 The authors acknowledge the Ministry of Land, Infrastructure, Transport and the Korea  
20 Meteorological Administration for providing radar data and AWS data for this work. The  
21 authors acknowledge Prof. V. N. Bringi at Colorado State University, who provided the  
22 scattering simulation code. The authors also acknowledge Prof. A. C. Illingworth at Reading  
23 University who provided valuable comments on  $Z_{DR}$  data quality. This research was funded by  
24 the Korea Meteorological Industry Promotion Agency under Grant KMIPA 2015-1050.

## References

- Andsager, K., Beard, K. V., and Laird, N. S.: A laboratory study of oscillations and axis ratios for large raindrops”, *Journal of the Atmospheric Sciences*, 55, 208-226, 1999.
- Austin, P. M.: Relation between measure radar reflectivity and surface rainfall, *Monthly Weather Review*, 115, 1053-1070, 1987.
- Beard, K. V. and Chuang, C.: A new model for the equilibrium shape of raindrops, *Journal of the Atmospheric Sciences*, 44, 1509-1524, 1987.
- Bringi, V. N. and Chandrasekar, V.: The polarimetric basis for characterizing precipitation. *Polarimetric Doppler weather radar: Principles and applications*, Cambridge University Press: Cambridge, UK, pp. 378-533, 2001.
- Bringi, V. N., Chandrasekar, V., Hubbert, J., Gorgucci, E., Randeu, W., and Schoenhuber, M.: Raindrop size distribution in different climate regimes from disdrometer and dual-polarized radar analysis, *Journal of Atmospheric Science*, 60, 354-365, 2003.
- Campos, E., Zawadzki, I.: “Instrumental uncertainties in Z-R relations”, *Journal of Applied Meteorology*, 36, 1088-1102, 2000.
- Cifelli, E. V., Chandrasekar, V., Lim, S., Kennedy, P. C., Wang, Y., and Rutledge, S. A.: A new dual-polarization radar rainfall algorithm: Application in Colorado precipitation events, *Journal of Atmospheric and Oceanic Technology*, 28, 352-364, 2011.
- Giangrande, S. E. and Ryzhkov, A. V.: Estimation of rainfall based on the results of polarimetric echo classification, *Journal of Climate and Applied Meteorology*, 47, 2445-2462, 2008.
- Gorgucci, E., Scarchilli, G., and Chandrasekar, V.: A procedure to calibrate multiparameter weather radar using properties of the rain medium. *IEEE Transactions on Geoscience and Remote Sensing*, 37, 269–276, 1999.
- Huang, G.-J., Bringi, V. N., and Thurai, M.: Orientation angle distributions of drops after 80 m fall using a 2D-video disdrometer, *Journal of Atmospheric Oceanic Technology*, 25, 1717-1723, 2008.
- Jang, M., Lee, D., and You, C.: Z-R relationship and DSD analyses using a POSS disdrometer. Part I: Precipitation cases in Busan, *Journal of the Korean Meteorological Society*, 40, 557-570, 2004.

1 Keat, W. J., Westbrook, C., Illingworth, A.: Measurements of the co-polar coefficient in rainfall  
2 and retrieval of the drop size distribution, 37<sup>th</sup> AMS on radar conference, 2015.

3 Mishchenko, M. I., Travis, L. D., and Mackowski, D. W.: T-matrix computations of light  
4 scattering by nonspherical particles: A review, *Journal of Quantitative Spectroscopy and*  
5 *Radiative Transfer*, 55, 535-575, 1996.

6 Löffler-Mang, M., Joss, J.: An optical disdrometer for measuring size and velocity of  
7 hydrometeors, *J. Atmos. Oceanic. Technol.*, 17, 130-139, 2000

8 Marks, D. A., Wolff, D. B., Carey, L. D., and Tokay, A.: Quality control and calibration of the  
9 dual-polarization radar at Kwajalein, RMI. *Journal of Atmospheric and Oceanic Technology*,  
10 28: 181–196, 2011.

11 May, P., Keenan, T. D., Zrnic, D. S., Carey, L., and Rutledge, S.: Polarimetric radar  
12 measurement of tropical rain at 5-cm wavelength, *Journal of Applied Meteorology*, 38, 750-  
13 765, 1999.

14 Ryzhkov, A. V. and Zrnic, D. S.: Discrimination between rain and snow with a polarimetric  
15 radar, *Journal of Applied Meteorology*, 37, 1228-1240, 1998.

16 Ryzhkov, A. V. and Zrnic, D. S.: Assessment of rainfall measurement that uses specific  
17 differential phase, *Journal of Applied Meteorology*, 35, 2080-2090, 1996.

18 Ryzhkov, A. V., Schuur, T. J., Burgess, D. W., Heinselman, P. L., Giangrande, S. E., and Zrnic,  
19 D. S.: The Joint Polarization Experiment: Polarimetric rainfall measurements and hydrometeor  
20 classification, *Bulletin of the American Meteorological Society*, 86, 809-824, 2005a.

21 Ryzhkov, A. V., Giangrande, S. E., Melnikov, V. M., and Schuur, T. J.: Calibration issues of  
22 dual-polarization radar measurements. *Journal of Atmospheric and Oceanic Technology*, 22:  
23 1138–1155, 2005b.

24 Ryzhkov, A., Diederich, M., Zhang, P., and Simmer, C.: Potential utilization of specific  
25 attenuation for rainfall estimation, mitigation of partial beam blockage, and radar networking,  
26 *Journal of Atmospheric and Oceanic Technology*, 31, 599-619, 2014.

27 Sheppard, B. E.: Measurement of raindrop size distributions using a small Doppler radar,  
28 *Journal of Atmospheric and Oceanic Technology*, 7, 255-268.

- 1 Suk, M., Nam, K., Kim, Y., and Oh, S.: Estimation of quantitative rain intensity from radar  
2 reflectivities using a wind probability matching method, *Journal of the Korean Meteorological*  
3 *Society*, 41, 123-138, 2005.
- 4 Trabal, J. M., V. Chandrasekar, E. Gorgucci and D. J. McLaughlin, 2009: Differential  
5 reflectivity(ZDR) calibration for CASA radar network using properties of the observed medium,  
6 *Geoscience and Remote Sensing Symposium, 2009 IEEE International, IGARSS 2009*  
7 (Volume:2 ) II-960-II963.
- 8 You, C., Lee, D., Jang, M., Uyeda, H., Shinoda, T., and Kobayashi, F.: Characteristics of  
9 rainfall systems accompanied with Changma front at Chujado in Korea, *Asia-Pacific Journal*  
10 *of Atmospheric Sciences*, 46, 41-51, 2010.
- 11 You, C., Lee, D., Jang, M., Seo, K., Kim, K., and Kim, B.: The characteristics of rain drop size  
12 distributions using a POSS in Busan area, *Journal of the Korean Meteorological Society*, 40,  
13 713-724, 2004.
- 14 You, C.-H., Lee, D.-I., Kang, M.-Y.: Rainfall estimation using specific differential phase for  
15 the first operational polarimetric radar in Korea, *Advances in Meteorology*, vol. 2014, Article  
16 ID 41317, 10 pages, doi:10.1155/2014/413717, 2014.
- 17 You, C.-H. and Lee, D.-I.: Algorithm development of the optimum rainfall estimation using  
18 polarimetric variables in Korea. *Advances in Meteorology*, vol. 2015, Article ID 395937, 15  
19 pages, doi:10.1155/2015/395937, 2015a.
- 20 You, C.-H. and Lee, D.-I.: Decadal variation in raindrop size distributions in Busan, Korea,  
21 *Advances in Meteorology*, vol. 2015, Article ID 329327, 8 pages, 2015,  
22 doi:10.1155/2015/329327, 2015b.
- 23 Vivekanandan, J., Zrnic, D. S., Ellis, S. M., Oye, R., Ryzhkov, A. V., and Straka, J.: Cloud  
24 microphysics retrieval using S-band dual-polarization radar measurements, *Bulletin of the*  
25 *American Meteorological Society*, 80, 381-388, 1999.
- 26 Waterman, P. C.: Symmetry, unitarity, and geometry in electromagnetic scattering, *Physical*  
27 *Review D*, 3, 825-839, 1971.
- 28 Wilson, J. W. and Brandes, E. A.: Radar measurement of rainfall-A summary, *Bulletin of the*  
29 *American Meteorological Society*, 60, 1048-1058, 1979.

Table 1. Rainfall cases used in this study.

| CASE   | Date and Time                   | Sources                             |
|--------|---------------------------------|-------------------------------------|
| Case 1 | 2012. 08. 23. 0900 LT ~ 1700 LT | Indirect effect of Typhoon          |
| Case 2 | 2012. 09. 08. 0100 LT ~ 0600 LT | Low pressure accompanied with front |
| Case 3 | 2014. 08.25. 0900 LT ~ 1600 LT  | Low pressure                        |

Table 2. Polarimetric radar rainfall relations (You et al., 2015a) used in this study.

| Relations                |                                       | Relations                                                 |                                            |
|--------------------------|---------------------------------------|-----------------------------------------------------------|--------------------------------------------|
| $R(Z)$                   | $R=0.017Z^{0.714}$                    | $R(K_{DP})$                                               | $R=61.5K_{DP}^{0.908}$                     |
| $R(A_H)$                 | $R=3409A_H^{1.02}$                    | $R(Z,Z_{DR})$                                             | $R=0.0148Z^{0.818}Z_{DR}^{-3.72}$          |
| $R(K_{DP},Z_{DR})$       | $R=82.2K_{DP}^{0.855}Z_{DR}^{-1.977}$ | $R(Z,K_{DP},A_H)$                                         | $R=17211Z^{-0.027}K_{DP}^{0.62}A_H^{0.65}$ |
| $R(Z,Z_{DR},K_{DP},A_H)$ |                                       | $R=4502Z^{-0.14}Z_{DR}^{-0.389}K_{DP}^{0.486}A_H^{0.653}$ |                                            |

1 Table 3. Statistics of the comparison of hourly rainfall amount between  $R(Z, Z_{DR})$  and gages  
2 with different  $Z_H$  and  $Z_{DR}$  bias sources for each case.

| $Z_H$ bias source | $Z_{DR}$ bias source | Cases | RMSE | NE   | CC   |
|-------------------|----------------------|-------|------|------|------|
| Observed $Z_{DR}$ | Observed $Z_{DR}$    | 1     | 5.3  | 0.94 | 0.87 |
|                   |                      | 2     | 7.5  | 0.47 | 0.85 |
|                   |                      | 3     | 17.2 | 0.66 | 0.77 |
|                   | $mZ_{DR}$            | 1     | 4.9  | 0.67 | 0.87 |
|                   |                      | 2     | 7.0  | 0.44 | 0.84 |
|                   |                      | 3     | 9.2  | 0.56 | 0.95 |
| $mZ_{DR}$         | Observed $Z_{DR}$    | 1     | 3.9  | 0.67 | 0.87 |
|                   |                      | 2     | 7.3  | 0.45 | 0.85 |
|                   |                      | 3     | 15.2 | 0.53 | 0.77 |
|                   | $mZ_{DR}$            | 1     | 3.6  | 0.63 | 0.89 |
|                   |                      | 2     | 6.8  | 0.43 | 0.84 |
|                   |                      | 3     | 7.4  | 0.45 | 0.95 |

1 Table 4. Same as Table 3 but for  $R(Z, Z_{DR}, K_{DP}, A_H)$ .

| $Z_H$ bias source | $Z_{DR}$ bias source | Cases | RMSE | NE   | CC   |
|-------------------|----------------------|-------|------|------|------|
| Observed $Z_{DR}$ | Observed $Z_{DR}$    | 1     | 3.2  | 0.53 | 0.74 |
|                   |                      | 2     | 6.6  | 0.4  | 0.86 |
|                   |                      | 3     | 5.2  | 0.3  | 0.95 |
|                   | $mZ_{DR}$            | 1     | 3.2  | 0.53 | 0.74 |
|                   |                      | 2     | 6.7  | 0.4  | 0.86 |
|                   |                      | 3     | 5.2  | 0.3  | 0.95 |
| $mZ_{DR}$         | Observed $Z_{DR}$    | 1     | 3.1  | 0.52 | 0.74 |
|                   |                      | 2     | 6.7  | 0.4  | 0.86 |
|                   |                      | 3     | 5.3  | 0.3  | 0.95 |
|                   | $mZ_{DR}$            | 1     | 3.1  | 0.52 | 0.74 |
|                   |                      | 2     | 6.7  | 0.4  | 0.86 |
|                   |                      | 3     | 5.4  | 0.31 | 0.95 |

2  
3  
4  
5  
6  
7  
8  
9  
10  
11  
12

1 Table 5. Same as Table 3 but for  $Z_{DR}$  biases determined by PARSIVEL.

| $Z_H$ bias source | $Z_{DR}$ bias source | Cases | RMSE | NE   | CC   |
|-------------------|----------------------|-------|------|------|------|
| Observed $Z_{DR}$ | Observed $Z_{DR}$    | 1     | 3.7  | 0.63 | 0.87 |
|                   |                      | 2     | 5.7  | 0.34 | 0.85 |
|                   |                      | 3     | 12.2 | 0.37 | 0.77 |
|                   | $mZ_{DR}$            | 1     | 3.3  | 0.57 | 0.89 |
|                   |                      | 2     | 5.7  | 0.34 | 0.84 |
|                   |                      | 3     | 5.1  | 0.28 | 0.95 |
| $mZ_{DR}$         | Observed $Z_{DR}$    | 1     | 2.7  | 0.44 | 0.87 |
|                   |                      | 2     | 5.7  | 0.34 | 0.85 |
|                   |                      | 3     | 11.3 | 0.33 | 0.77 |
|                   | $mZ_{DR}$            | 1     | 2.4  | 0.4  | 0.89 |
|                   |                      | 2     | 5.8  | 0.35 | 0.84 |
|                   |                      | 3     | 5.1  | 0.25 | 0.95 |

2

3

4

5

6

7

8

9

10

11

12



1 Table 6. Same as Table 4 but for  $Z_{DR}$  biases determined by PARSIVEL.

| $Z_H$ bias source | $Z_{DR}$ bias source | Cases | RMSE | NE   | CC   |
|-------------------|----------------------|-------|------|------|------|
| Observed $Z_{DR}$ | Observed $Z_{DR}$    | 1     | 3.2  | 0.54 | 0.74 |
|                   |                      | 2     | 6.4  | 0.38 | 0.86 |
|                   |                      | 3     | 5.0  | 0.29 | 0.95 |
|                   | $mZ_{DR}$            | 1     | 3.2  | 0.54 | 0.74 |
|                   |                      | 2     | 6.4  | 0.38 | 0.86 |
|                   |                      | 3     | 5.0  | 0.3  | 0.95 |
| $mZ_{DR}$         | Observed $Z_{DR}$    | 1     | 3.2  | 0.53 | 0.74 |
|                   |                      | 2     | 6.4  | 0.38 | 0.86 |
|                   |                      | 3     | 5.1  | 0.3  | 0.95 |
|                   | $mZ_{DR}$            | 1     | 3.2  | 0.53 | 0.74 |
|                   |                      | 2     | 6.4  | 0.38 | 0.86 |
|                   |                      | 3     | 5.1  | 0.3  | 0.95 |

2

3

4

5

6

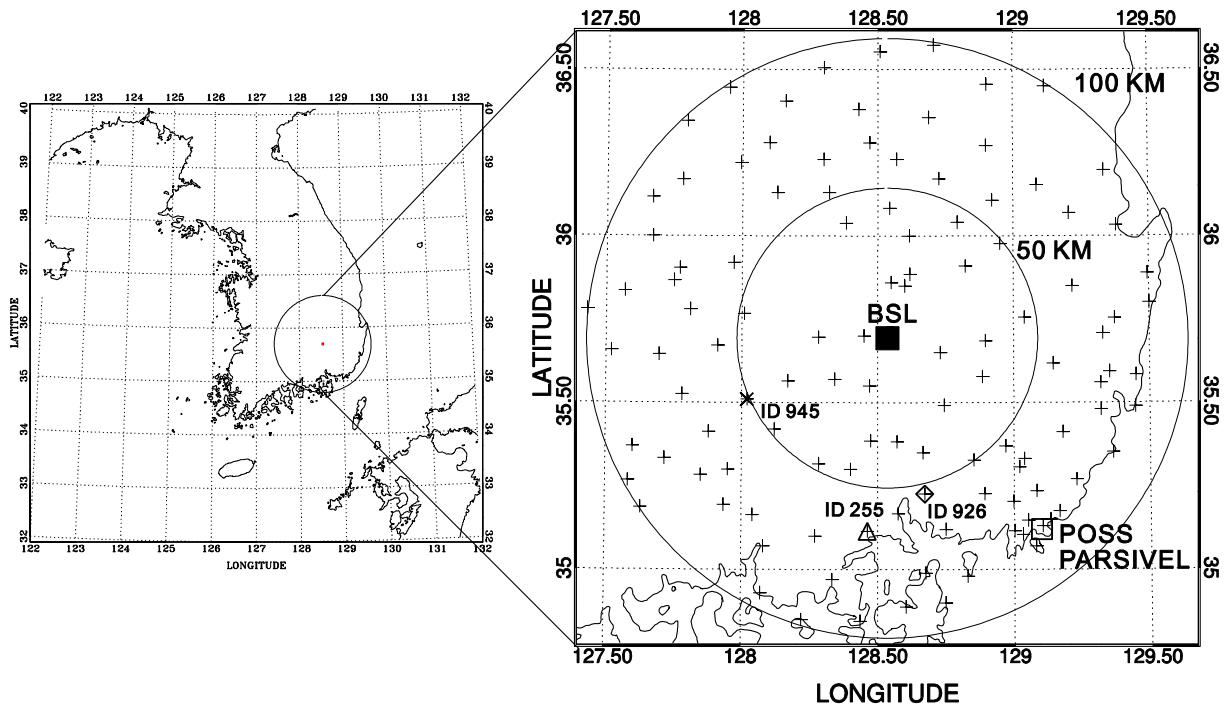

Figure 1. Location of Bislsan radar (solid rectangle), the POSS and PARSIVEL disdrometer (open rectangle), and rain gages (plus signs) distributed within 100 km of the radar. Cross, triangle, diamond with plus shows ID 945, ID 255, and ID 926, respectively. The circles are at 50 and 100 km from the radar.

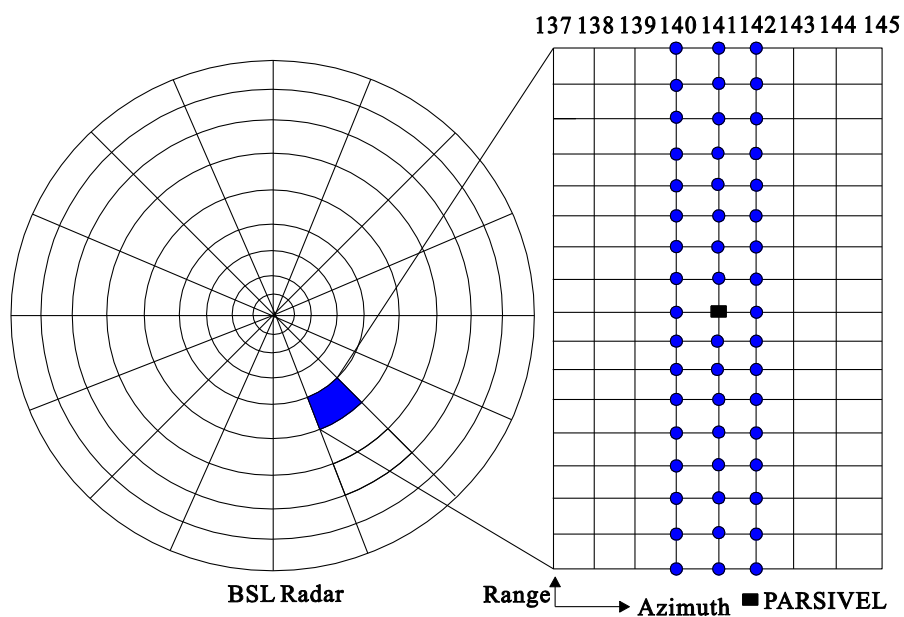

Figure 2. Schematic diagram for the comparison of radar and PARSIVEL  $Z_{DR}$ . The numbers refer to azimuth angle.

(a)

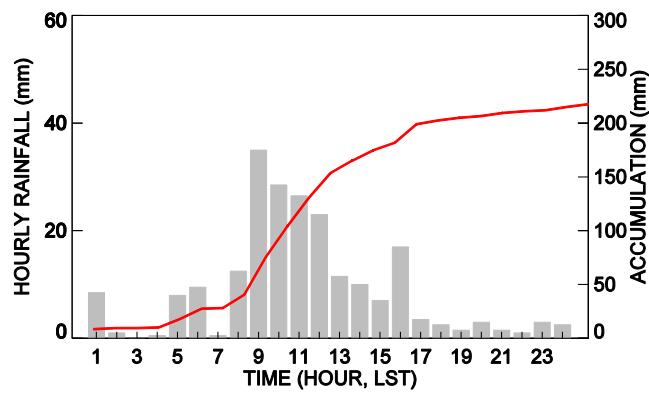

(b)

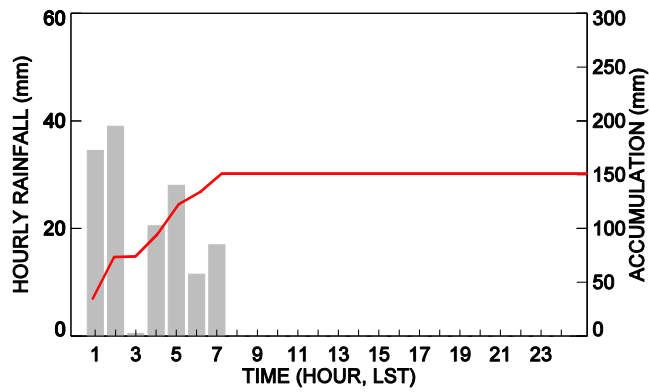

(c)

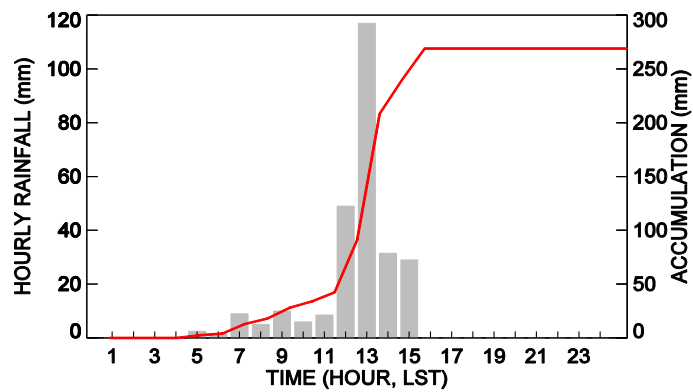

Figure 3. Time series of hourly rainfall (gray bars) and accumulation (red line) from the three gages that recorded the highest rainfall (a) 23 August 2012 at ID 945, (b) 8 September 2012 at ID 255, and (c) 25 August 2014 at ID 926.

1 (a)

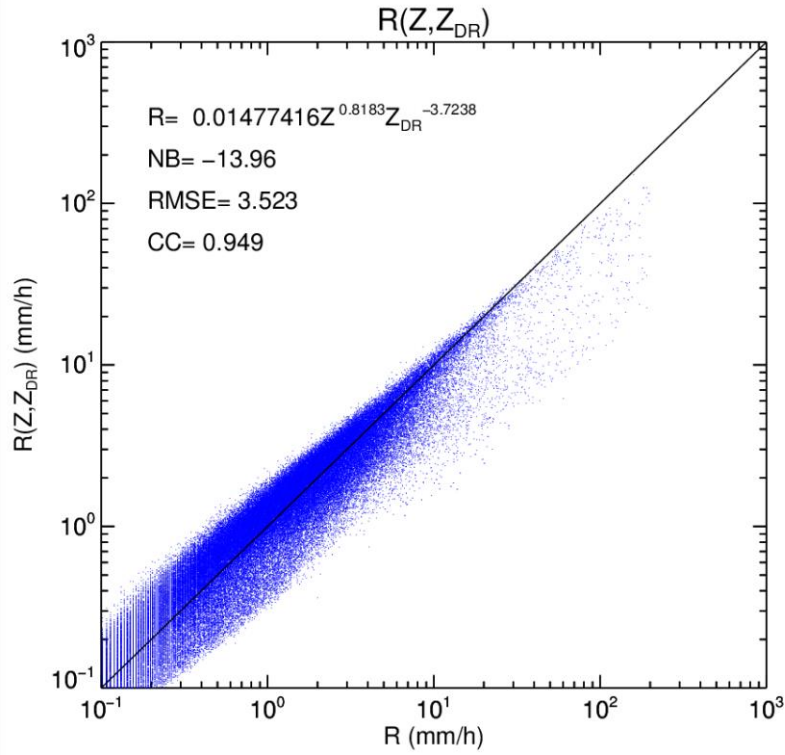

(b)

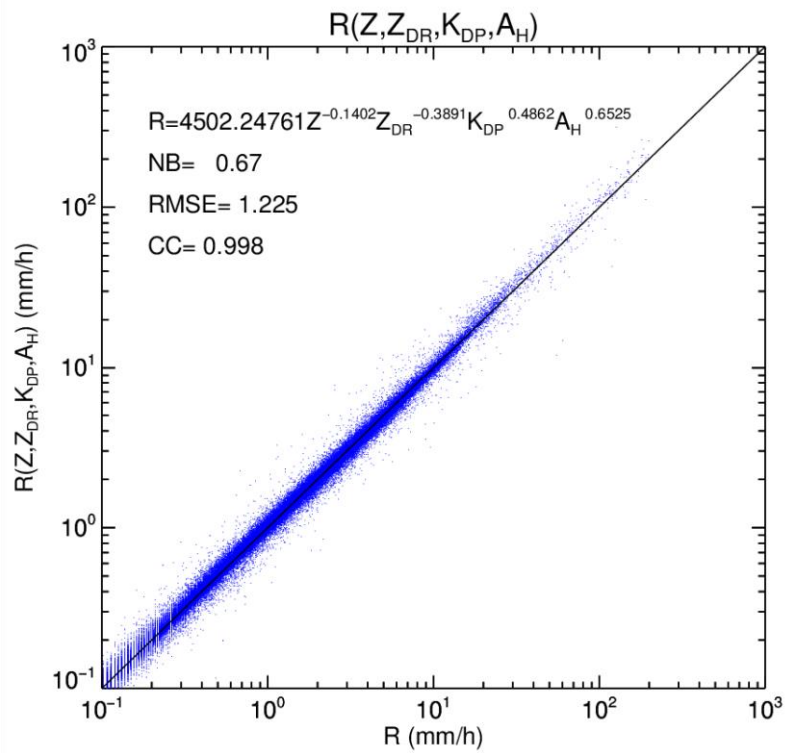

5 Figure 4. Scatter plot of rain rate measured by disdrometer and polarimetric radar rainfall  
 6 relation (a)  $R(Z, Z_{DR})$  and  $R(Z, Z_{DR}, K_{DP}, A_H)$ . The rainfall relation and statistical values are also  
 7 shown.

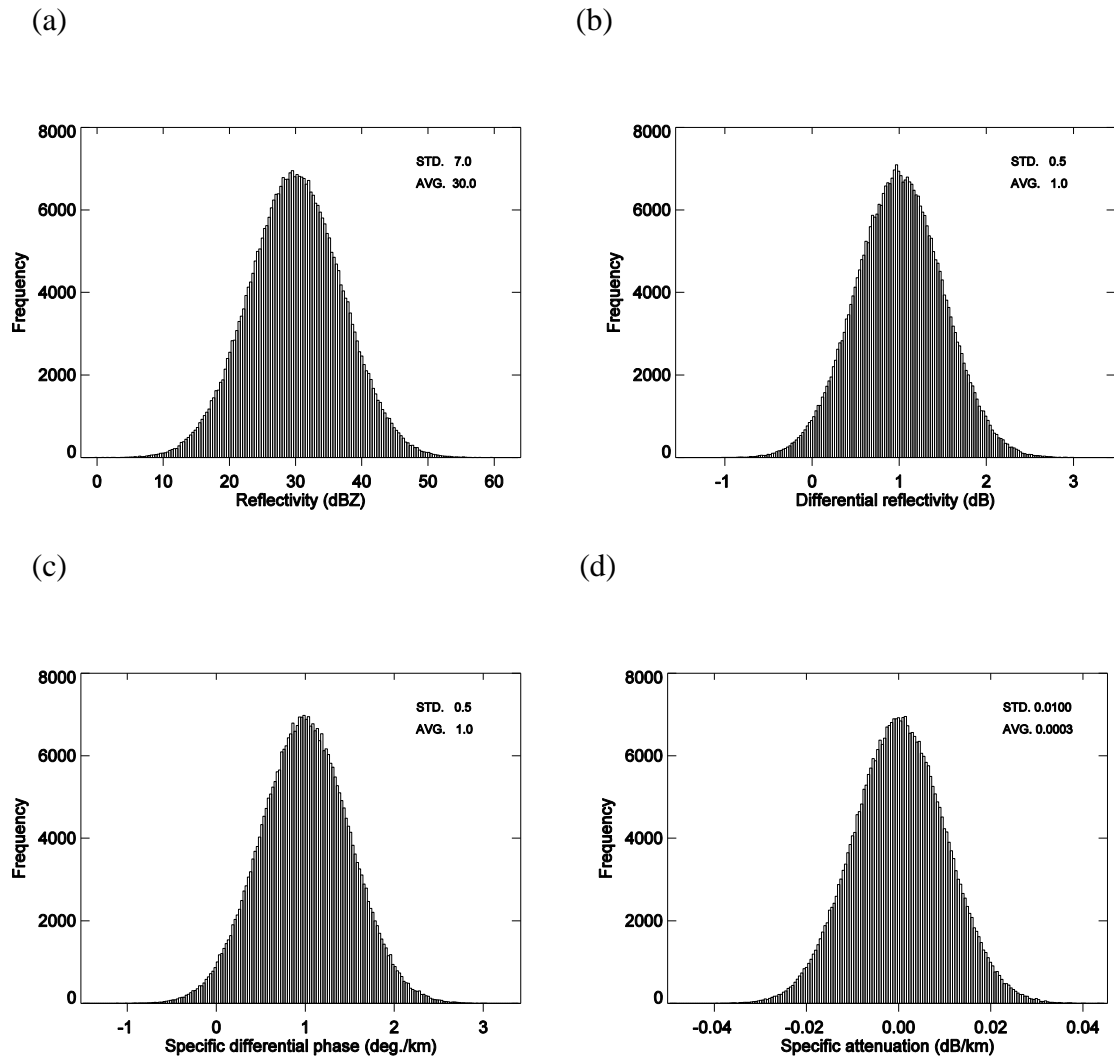

Figure 5. Distribution frequencies of the generated polarimetric variables. (a)  $Z_H$ , (b)  $Z_{DR}$ , (c)  $K_{DP}$ , and (d)  $A_H$ .

(a)

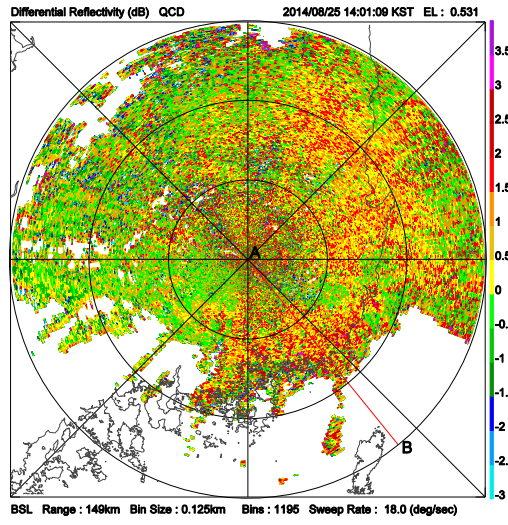

(b)

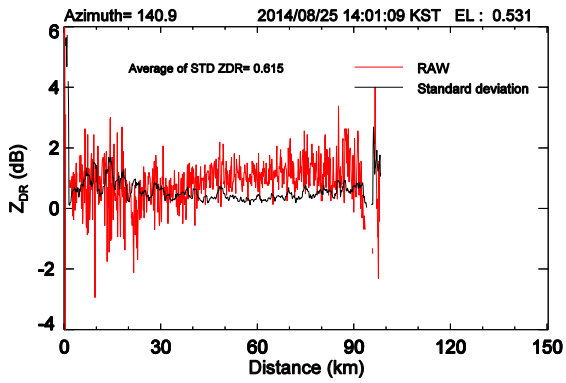

(c)

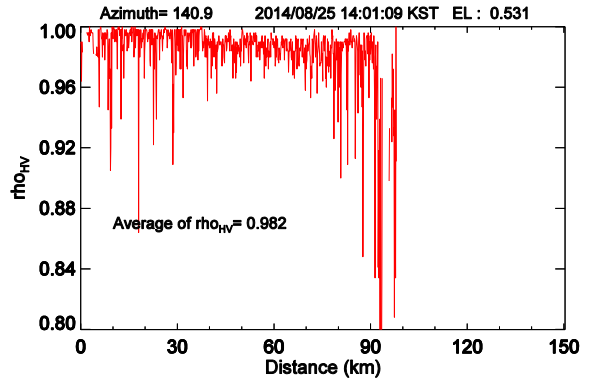

Figure 6. (a) Distribution of  $Z_{DR}$  within the radar coverage, (b) the radial profile of  $Z_{DR}$  and (c) cross correlation along the line A–B in (a) at 1401 LT 25 August 2014.

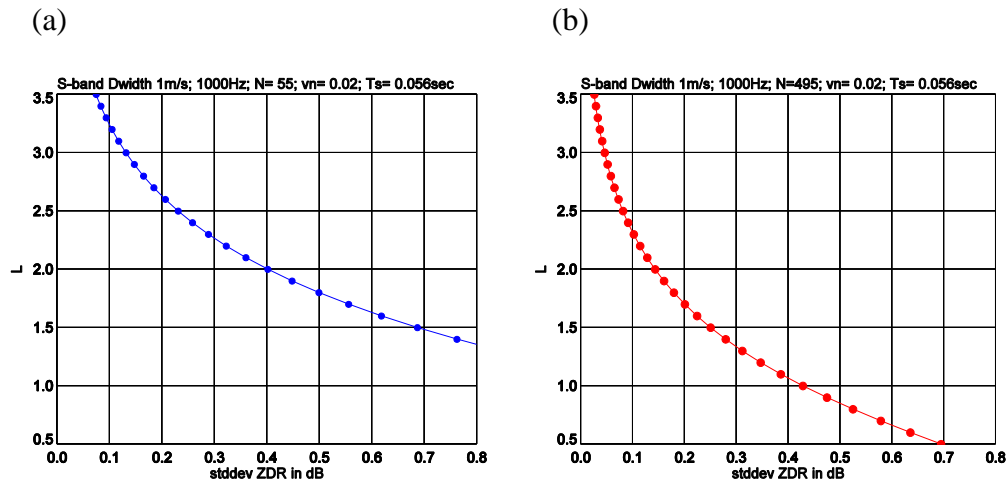

Figure 7. Theoretical relation between standard deviation of  $Z_{DR}$  and cross correlation using (a) the scan configuration of the Bislsan radar. Dwell time is 56 ms, number of samples is 55, normalized Doppler width is 0.02; (b) same as (a) but for 495 samples.



(a)

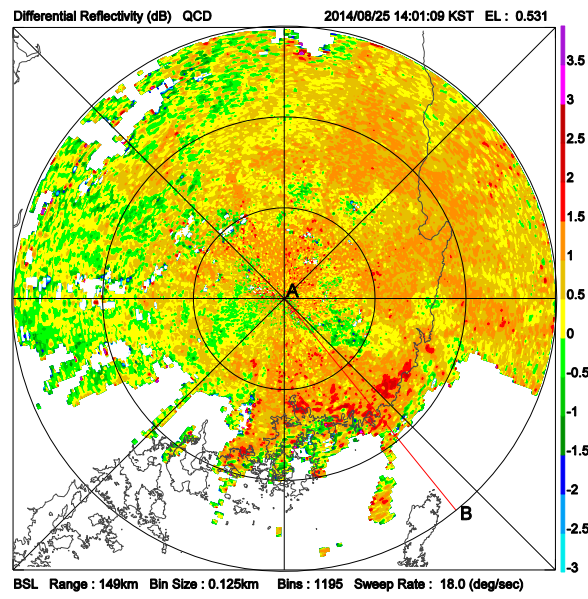

(b)

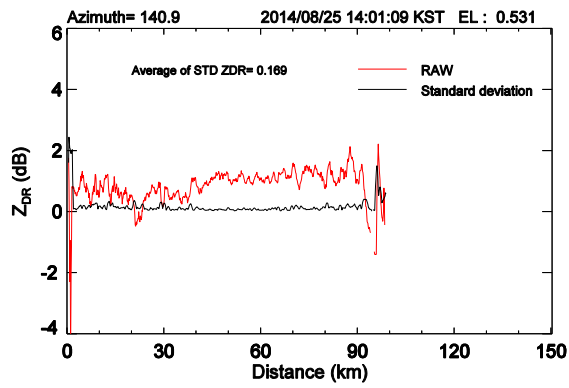

(c)

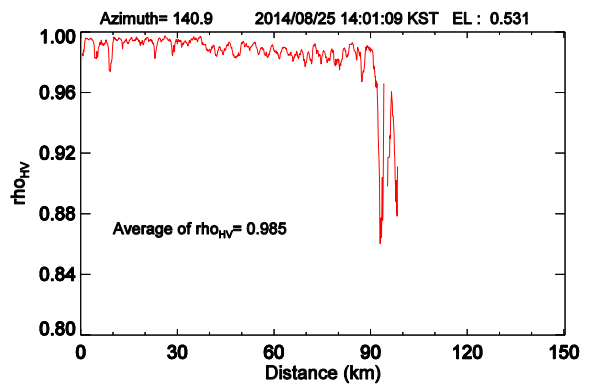

Figure 8. Same as Fig. 6 but for moving averages of  $Z_{DR}$ .

1 (a)

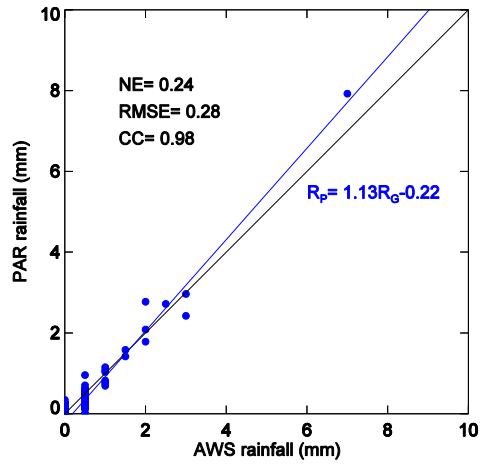

2

3 (b)

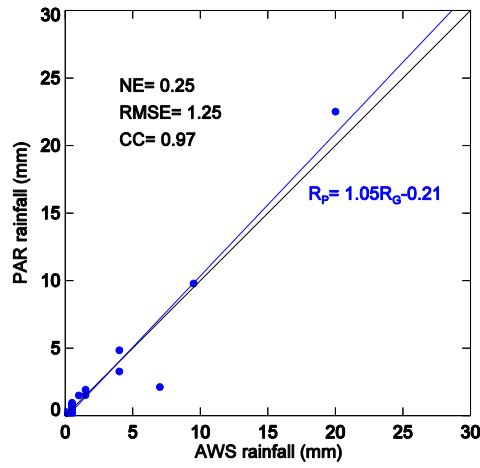

4

5 (c)

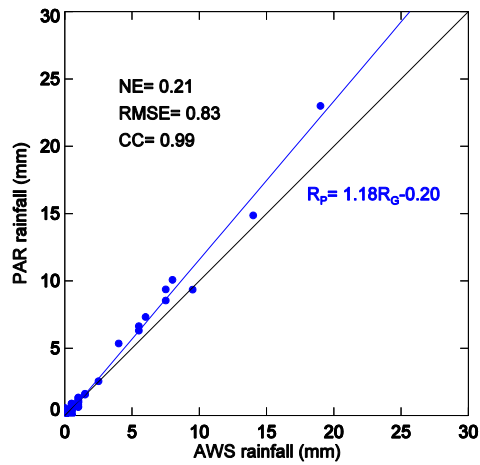

6

7 Figure 9. Scatter plot of 10 min rainfall amount measured by PARSIVEL and gage for 24 hours  
8 for (a) Case 1, (b) Case 2, and (c) Case 3, respectively.

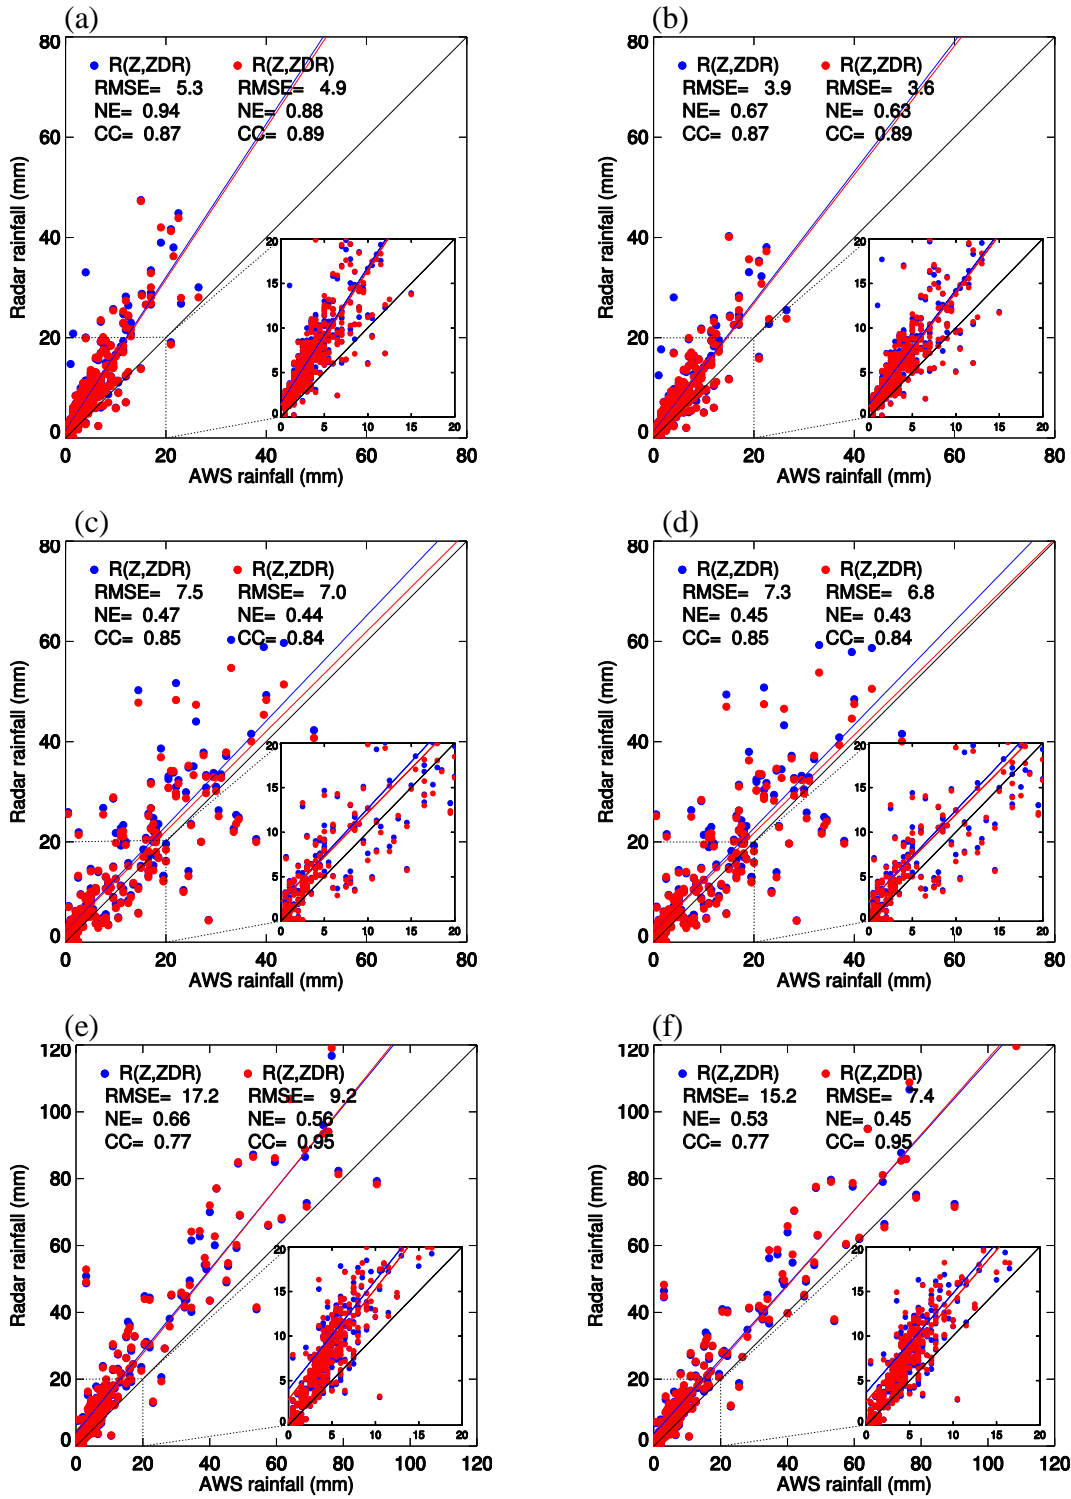

Figure 10. Scatter plot of 1 hour rainfall obtained by R(Z, Z<sub>DR</sub>) against gage rainfall. (a, c, e) Radar rainfall was calculated using Z<sub>H</sub> bias calculated from observed Z<sub>DR</sub> bias and Z<sub>DR</sub> biases calculated from observed Z<sub>DR</sub> (blue full circles) and mZ<sub>DR</sub> (red full circles), (b, d, f) same as (a, c, e) but for Z<sub>H</sub> bias calculated from mZ<sub>DR</sub> on Case 1, Case 2, and Case 3, respectively. The small window on each panel shows the zoom-in the scatters up to 20 mm h<sup>-1</sup>.

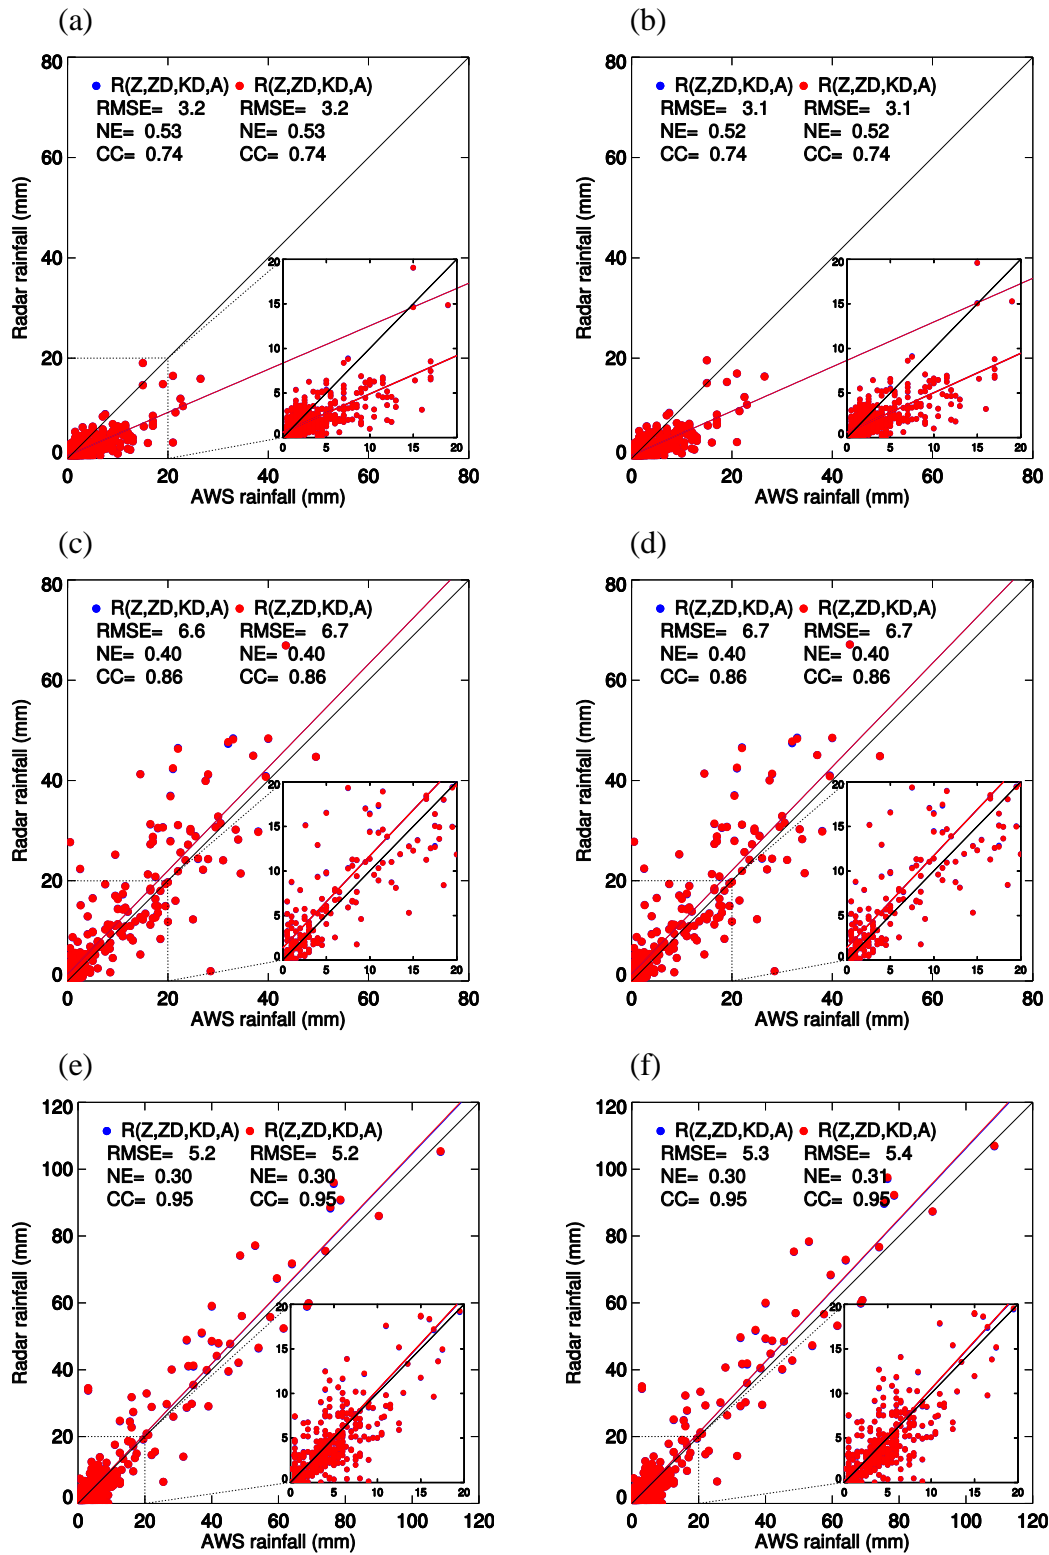

Figure 11. Same as Fig. 10 but for radar rainfall obtained by  $R(Z, Z_{DR}, K_{DP}, A_H)$ .

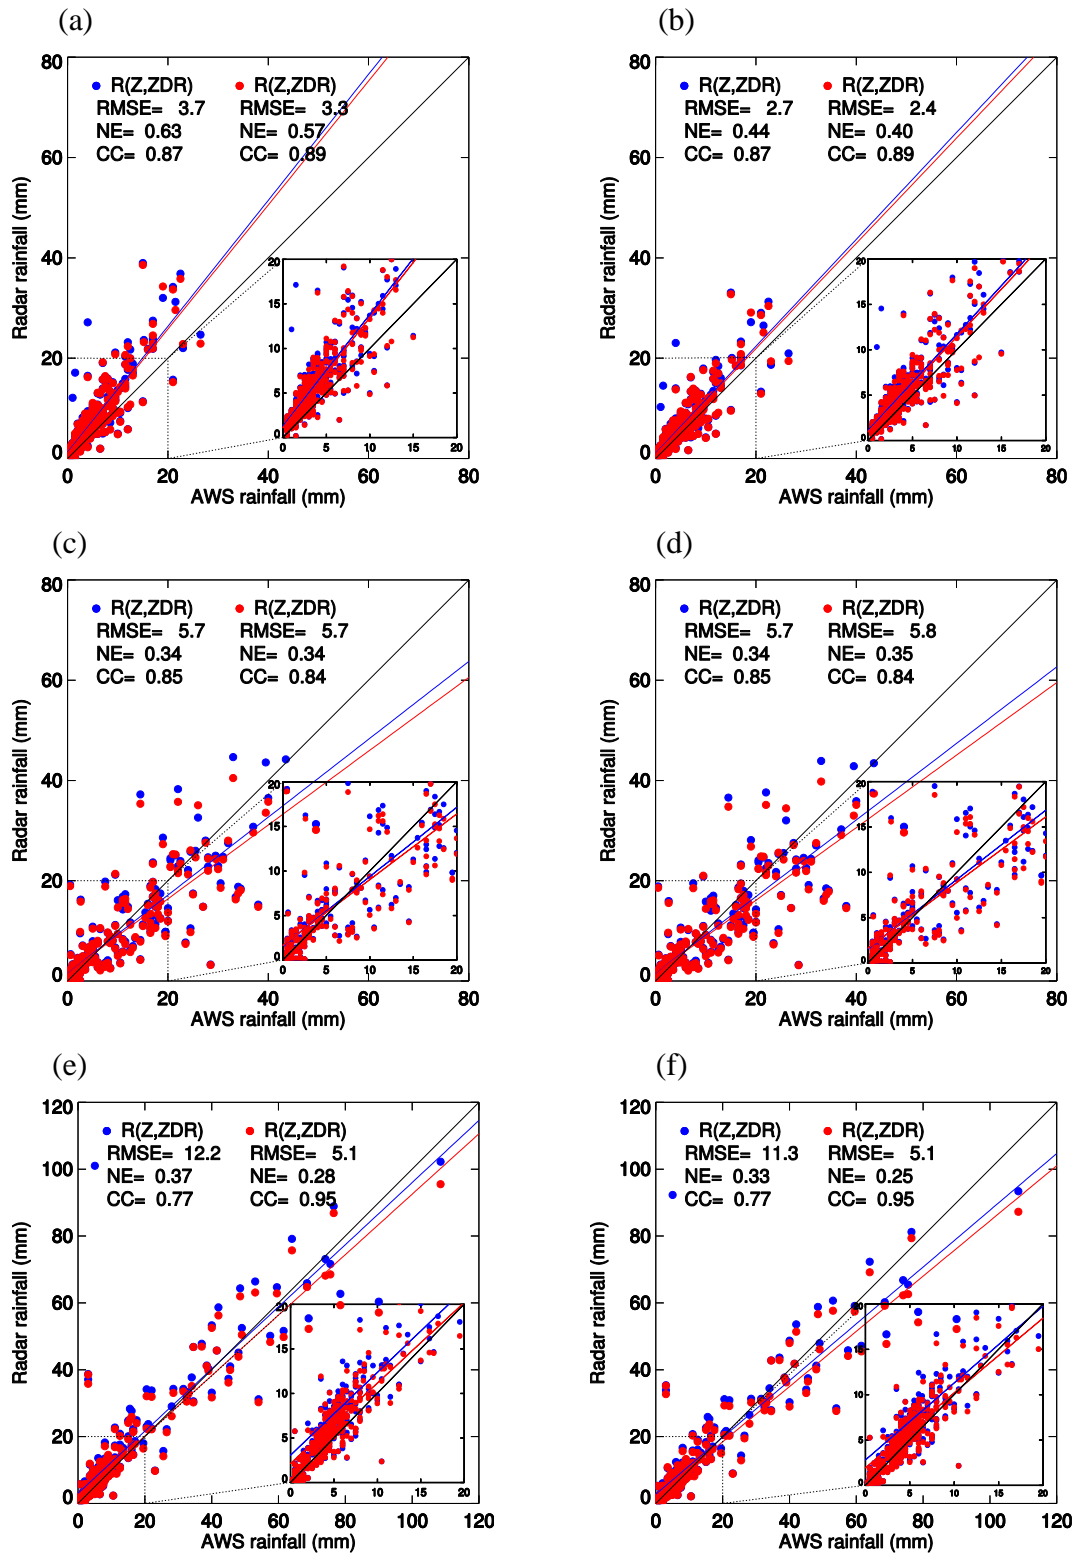

Figure 12. Same as Fig. 10 but for  $Z_{DR}$  biases determined by PARSIVEL.

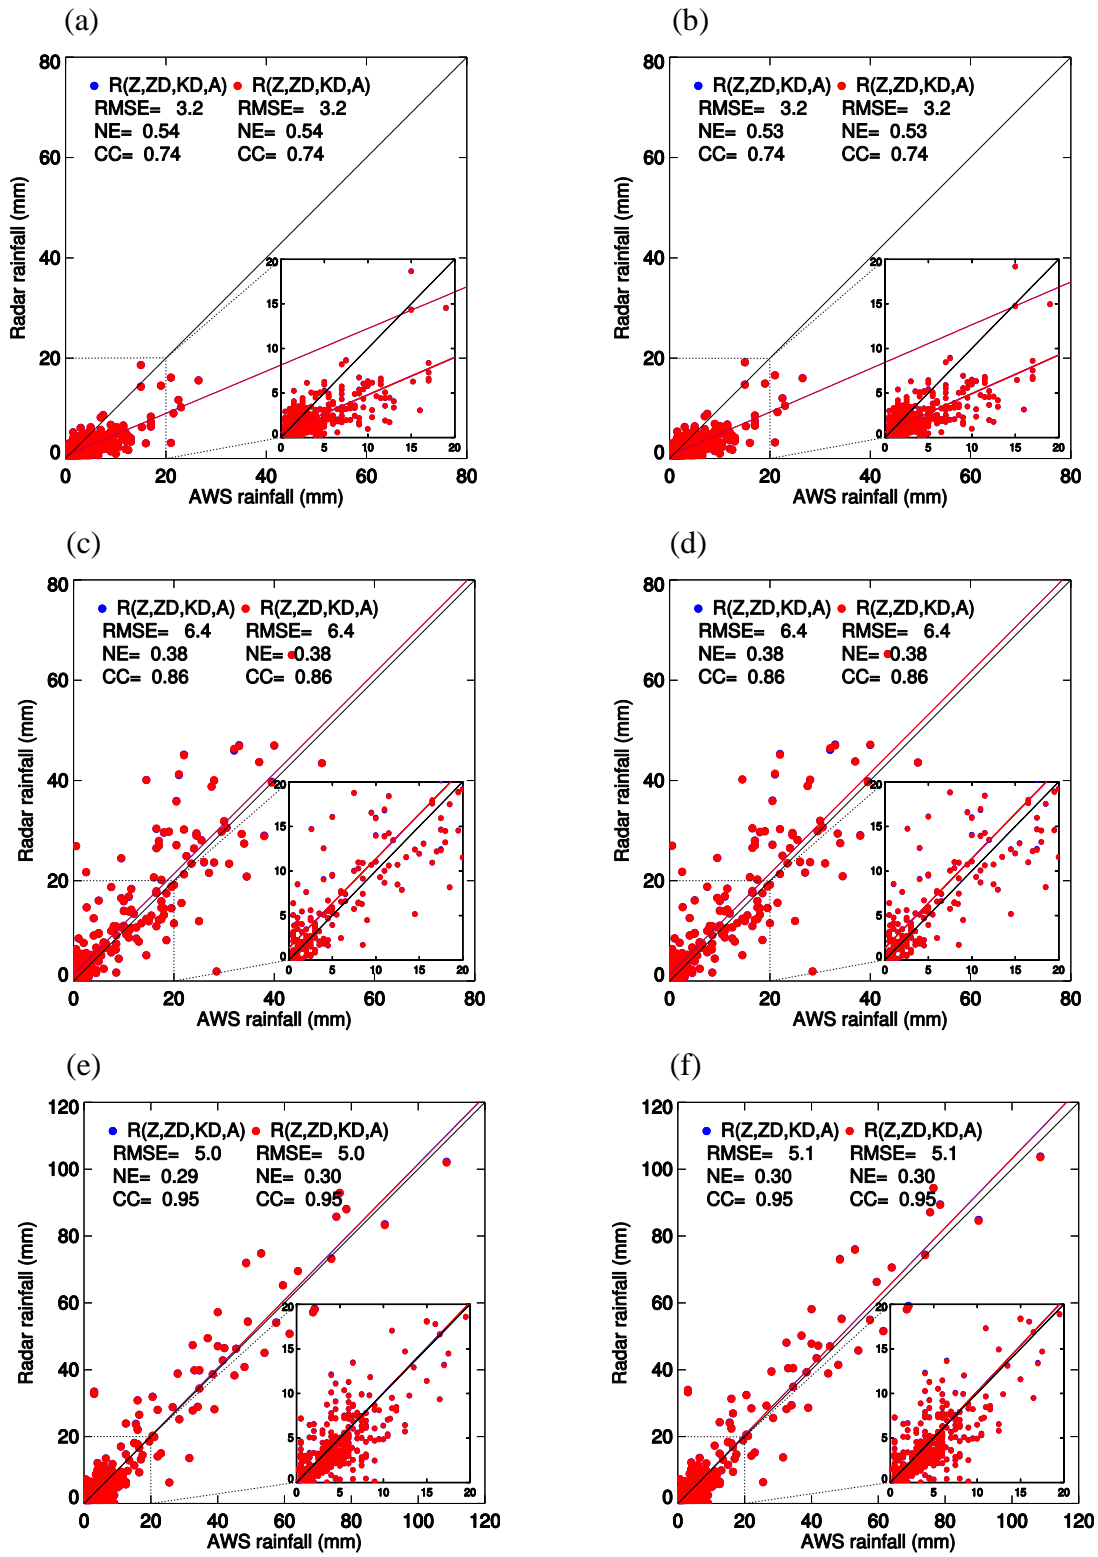

Figure 13. Same as Fig. 11 but for  $Z_{DR}$  biases determined by PARSIVEL.

1 (a)

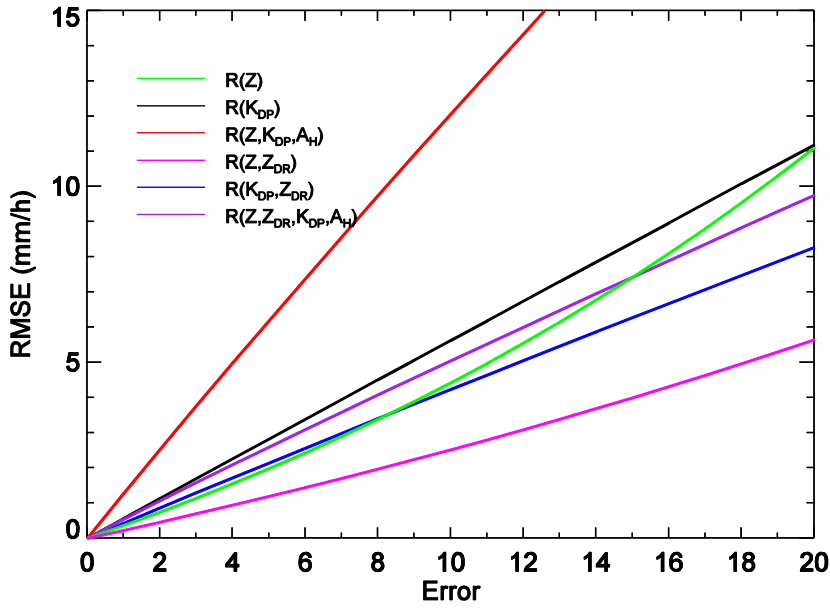

2

3 (b)

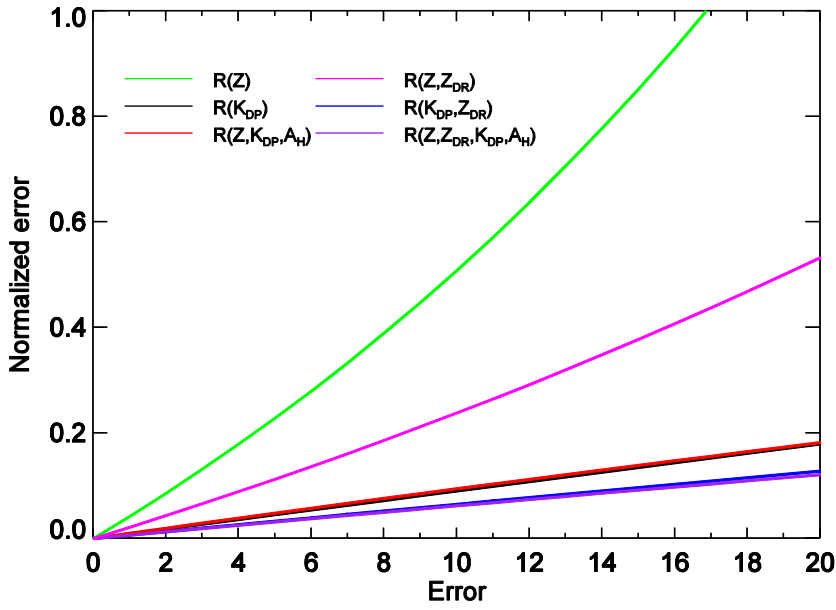

4

5 Figure 14. Distribution of (a) RMSE and (b) NE with generated errors for different rainfall  
6 relations. Magenta, black, red, green, blue, and purple lines show RMSE and NE obtained  
7 from the rainfall relations  $R(Z)$ ,  $R(K_{DP})$ ,  $R(Z, K_{DP}, A_H)$ ,  $R(Z, Z_{DR})$ ,  $R(K_{DP}, Z_{DR})$ , and  
8  $R(Z, Z_{DR}, K_{DP}, A_H)$ , respectively.
